# Supplementary material for: Effect of Pb2+, Cd2+, Cu2+ and dissolved organic carbon (DOC) on the distribution and partition of decabromodiphenyl ether (BDE-209) in a water–sediment system
Source: Royal Society of Chemistry journal article supplement (doi:10.1039/c5ra17443k), 2015-01-01
Supplement: c5ra17443k1.pdf [file c5ra17443k1.pdf]

**Table S1**

Regression data for BDE209 sorption using linear sorption isotherms

| Heavy metals     | Concentration (mg L <sup>-1</sup> ) | $K_d$ (L g <sup>-1</sup> ) | $R^2$ | Formula                 |
|------------------|-------------------------------------|----------------------------|-------|-------------------------|
| Cd <sup>2+</sup> | 0                                   | 0.165 (0.011)              | 0.984 | y=0.165(0.011)x-0.0002  |
|                  | 2                                   | 0.238 (0.032)              | 0.994 | y=0.238(0.032)x-0.0001  |
|                  | 3                                   | 0.314 (0.027)              | 0.994 | y=0.314 (0.027)x+0.0007 |
|                  | 5                                   | 0.539 (0.049)              | 0.999 | y=0.539(0.049)x-0.00017 |
|                  | 10                                  | 0.623 (0.051)              | 0.995 | y=0.623(0.051)x-0.0009  |
|                  | 0                                   | 0.165 (0.011)              | 0.984 | y=0.165(0.011)x-0.0002  |
| Pb <sup>2+</sup> | 2                                   | 0.274 (0.027)              | 0.998 | y=0.274(0.027)x-0.0007  |
|                  | 3                                   | 0.301 (0.011)              | 0.996 | y=0.301(0.011)x+0.0002  |
|                  | 5                                   | 0.533 (0.021)              | 0.998 | y=0.533(0.021)x-0.0021  |
|                  | 10                                  | 0.637 (0.062)              | 0.994 | y=0.637(0.062)x-0.0013  |
|                  | 0                                   | 0.165 (0.011)              | 0.984 | y=0.165(0.011)x-0.0002  |
| Cu <sup>2+</sup> | 2                                   | 0.205 (0.012)              | 0.970 | y=0.205(0.012)x-0.0012  |
|                  | 3                                   | 0.268 (0.021)              | 0.962 | y=0.268(0.021)x-0.0019  |
|                  | 5                                   | 0.318 (0.017)              | 0.986 | y=0.318(0.017)x-0.0014  |
|                  | 10                                  | 0.466 (0.019)              | 0.977 | y=0.466(0.019)x-0.0024  |
|                  | 0                                   | 0.165 (0.011)              | 0.984 | y=0.165(0.011)x-0.0002  |

$K_d$  is the partition coefficient and  $R^2$  is the simulated correlation constants for BDE209 sorption by linear equation. Standard deviation was shown in bracket.
